# Supplementary material for: A naringin-derived bioink enhances the shape fidelity of 3D bioprinting and efficiency of cartilage defect repair
Source: Royal Society of Chemistry journal article supplement (doi:10.1039/d2tb01247b), 2022-01-01
Supplement: d2tb01247b1.pdf [file d2tb01247b1.pdf]

## **A naringin-derived bioink enhances shape fidelity of 3D bioprinting and efficiency of cartilage defects repair**

*Yuting Huang, Xiaolin Meng, Zheng Zhou\*, Wenxiang Zhu, Xin Chen, Yahui He, Ning He, Xiaoxiao Han, Dengming Zhou, Xuanchu Duan, Pankaj M. Vadgama and Hairong Liu\**

Y. Huang, X. Meng, Prof. Z. Zhou\*, W. Zhu, X. Chen, Y. He, N. He, Prof. X. Han, D. Zhou, Prof. X. Duan, Prof. P. Vadgama and Prof. H. Liu\*

Y. Huang, X. Meng, W. Zhu, X. Chen, Y. He, Prof. H. Liu  
College of Material Science and Engineering, Hunan University, Changsha, Hunan, 410082, China

E-mail: liuhairong@hnu.edu.cn

Prof. Z. Zhou

College of Biology, Hunan University, Changsha, Hunan, 410082, China

E-mail: zhouzheng@hnu.edu.cn

N. He, Prof. X. Han

State Key Laboratory of Advanced Design and Manufacture for Vehicle Body, Hunan University, Changsha, Hunan, 410082, China

D. Zhou

Department of Ophthalmology, the Second Xiangya Hospital, Central South University, Changsha, Hunan, 410011, China

Prof. X. Duan

Aier School of Ophthalmology, Central South University, Changsha, Hunan, 410000, China

Changsha Aier Eye Hospital, Aier Eye Hospital Group, Changsha, Hunan, 410000, China

Prof. P. Vadgama

School of Engineering and Materials Science, Queen Mary University London, London E1 4NS, UK

## Supplementary Figures

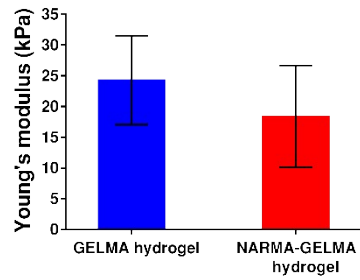

Figure S1. Young's modulus of NARMA-GELMA hydrogel and GELMA hydrogel.

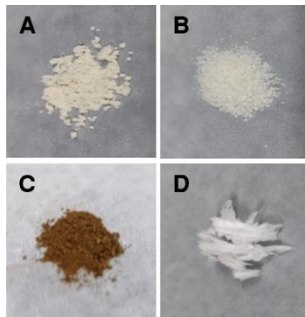

Figure S2. Observation of raw materials and modified products. (A) NAR, (B) GEL, (C) NARMA, (D) GELMA.

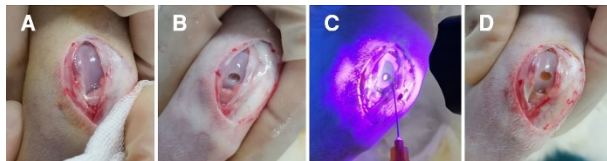

Figure S3. The injection and photocuring process of NAR derived medical bioink for cartilage repair in the rabbit articular cartilage defect model. (A) Joint exposure. (B) Cartilage defect creating. (C) Bioink implantation. (D) Observation of the fixed sample.

## Supplementary Tables

Table S1. 3D printing parameters of NAR derived bioink and GELMA bioink.

| Model<br>(100 $\mu\text{m}/\text{layer}$ )        | NAR derived bioink    |                               | GELMA bioink          |                               |
|---------------------------------------------------|-----------------------|-------------------------------|-----------------------|-------------------------------|
|                                                   | One sixth of a sphere | Cylindrical channel structure | One sixth of a sphere | Cylindrical channel structure |
| Size (mm)                                         | 6<br>(Diameter)       | 0.5<br>(Hole diameter)        | 6<br>(Diameter)       | 0.5<br>(Hole diameter)        |
| Section numbers                                   | 15                    | 15                            | 15                    | 15                            |
| Exposure intensity<br>( $\text{mW}/\text{cm}^2$ ) | 20                    | 20                            | 6                     | 6                             |
| Exposure time (s)                                 | 8                     | 8                             | 8                     | 8                             |

Table S2. The sequence of primers used for RT-qPCR.

| <i>RNA</i>    | <i>The full name of each RNA</i>                | <i>5' -3'</i> | <i>Primer</i>            |
|---------------|-------------------------------------------------|---------------|--------------------------|
| <i>GAPDH</i>  | <i>Glyceraldehyde-3-phosphate dehydrogenase</i> | forward       | TTGTCGCCATCAATGATCCAT    |
|               |                                                 | reverse       | GATGACCAGCTTCCCGTTCTC    |
| <i>SOX9</i>   | <i>SRY-box transcription factor 9</i>           | forward       | GCGTCAACGGCTCCAGCAAGA    |
|               |                                                 | reverse       | GCGTTGTGCAGGTGCGGGTAC    |
| <i>COL II</i> | <i>Collagen type II</i>                         | forward       | GAGAGCCTGGGACCCCTGGAA    |
|               |                                                 | reverse       | CGCCTCCAGCCTTCTCGTCAA    |
| <i>COL I</i>  | <i>Collagen type I</i>                          | forward       | CTAGCCACCTGCCAGTCTTTA    |
|               |                                                 | reverse       | GGACCATCATCACCATCTCTG    |
| <i>RUNX2</i>  | <i>Runt-related transcription factor 2</i>      | forward       | CGGCAGCGTAGGTCTTGGTGA    |
|               |                                                 | reverse       | CGGCAGCGTAGGTCTTGGTGA    |
| <i>COL X</i>  | <i>Collagen type X</i>                          | forward       | GCAGCAGCATTATGACCCAACAAC |
|               |                                                 | reverse       | ACAGGCGTGCCATTCTTATACAGG |
| <i>SOD1</i>   | <i>Superoxide Dismutase 2</i>                   | forward       | GCACGGATTCCATGTCCACCA    |
|               |                                                 | reverse       | TCACATTACCCAGGTCGCCCA    |
| <i>SOD2</i>   | <i>Superoxide Dismutase 1</i>                   | forward       | CAGAAGCACAGCCTCCCCGAC    |
|               |                                                 | reverse       | CCGTGGCGTTCAGGTTGTTCA    |
| <i>BCL-2</i>  | <i>B-Cell Leukemia/Lymphoma 2</i>               | forward       | CGGAAGGGACTGGACCAGAGA    |
|               |                                                 | reverse       | GCTGTCATGGGGATCACCTCC    |
| <i>CASP10</i> | <i>Caspase 10</i>                               | forward       | GCTCTACGAACTGGCAGAAGC    |
|               |                                                 | reverse       | CAGATGTTCCAGCAAATGCAG    |
